# Supplementary figures and images for: Histoplasma capsulatum Isolated from Tadarida brasiliensis Bats Captured in Mexico Form a Sister Group to North American Class 2 Clade
Source: MDPI journal article supplement (doi:10.3390/jof7070529), 2021-06-30

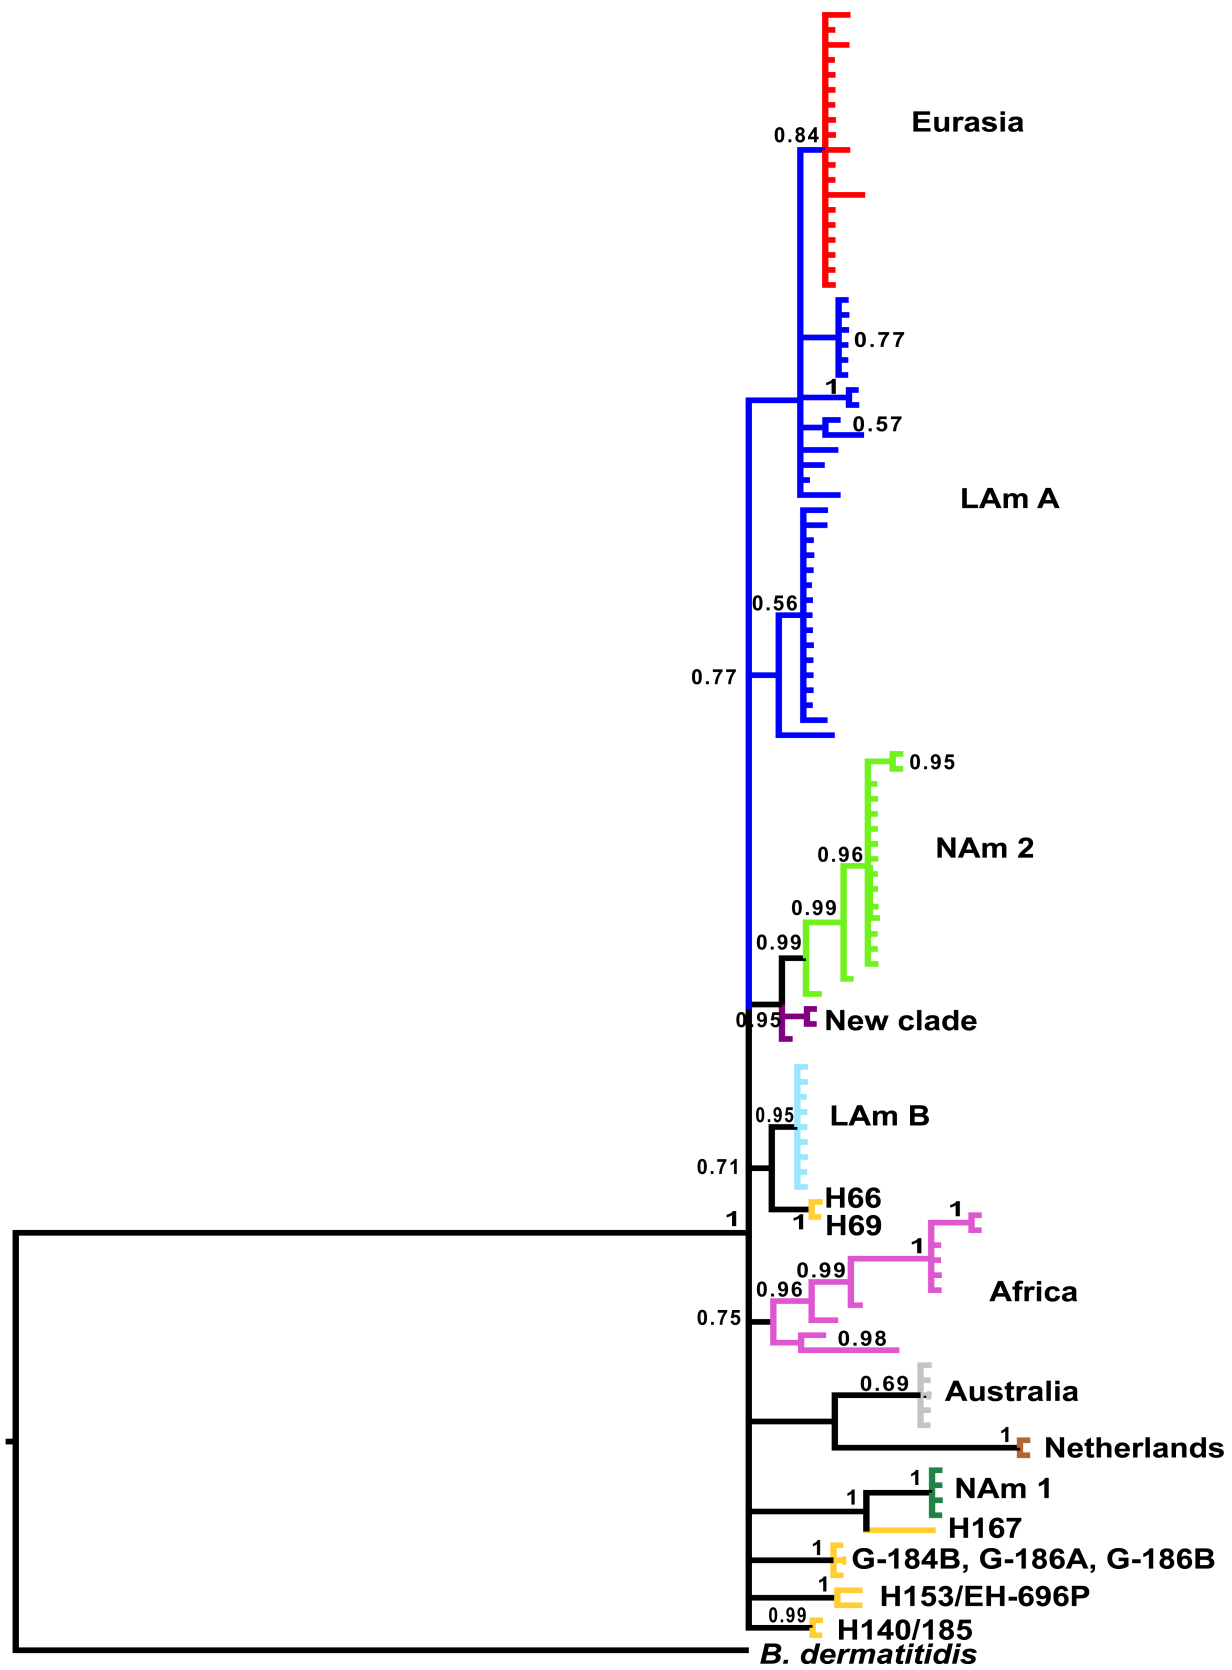

Supplement: s1 [file s1]

**tub1**

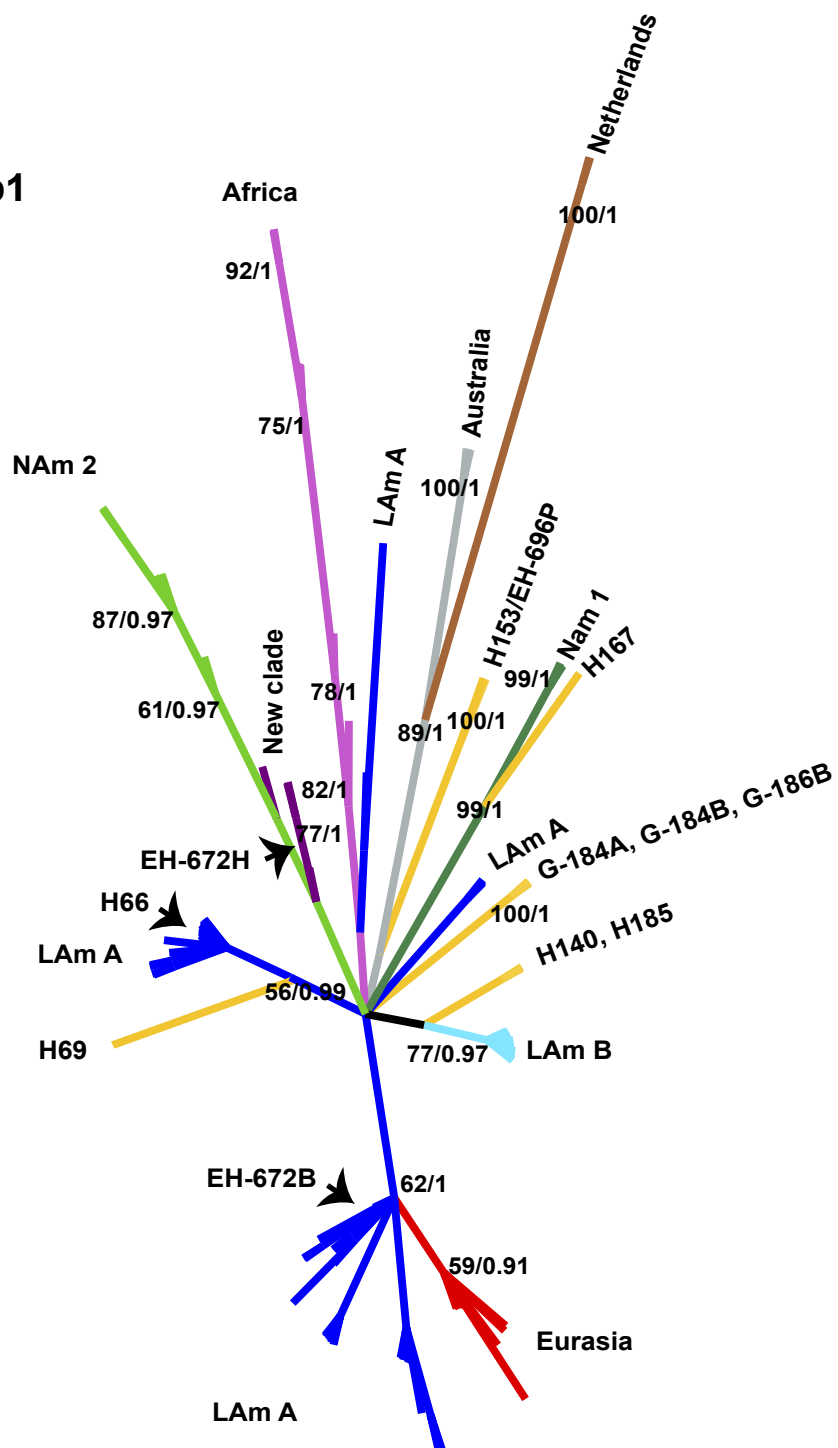

Supplement: s1 [file s1]

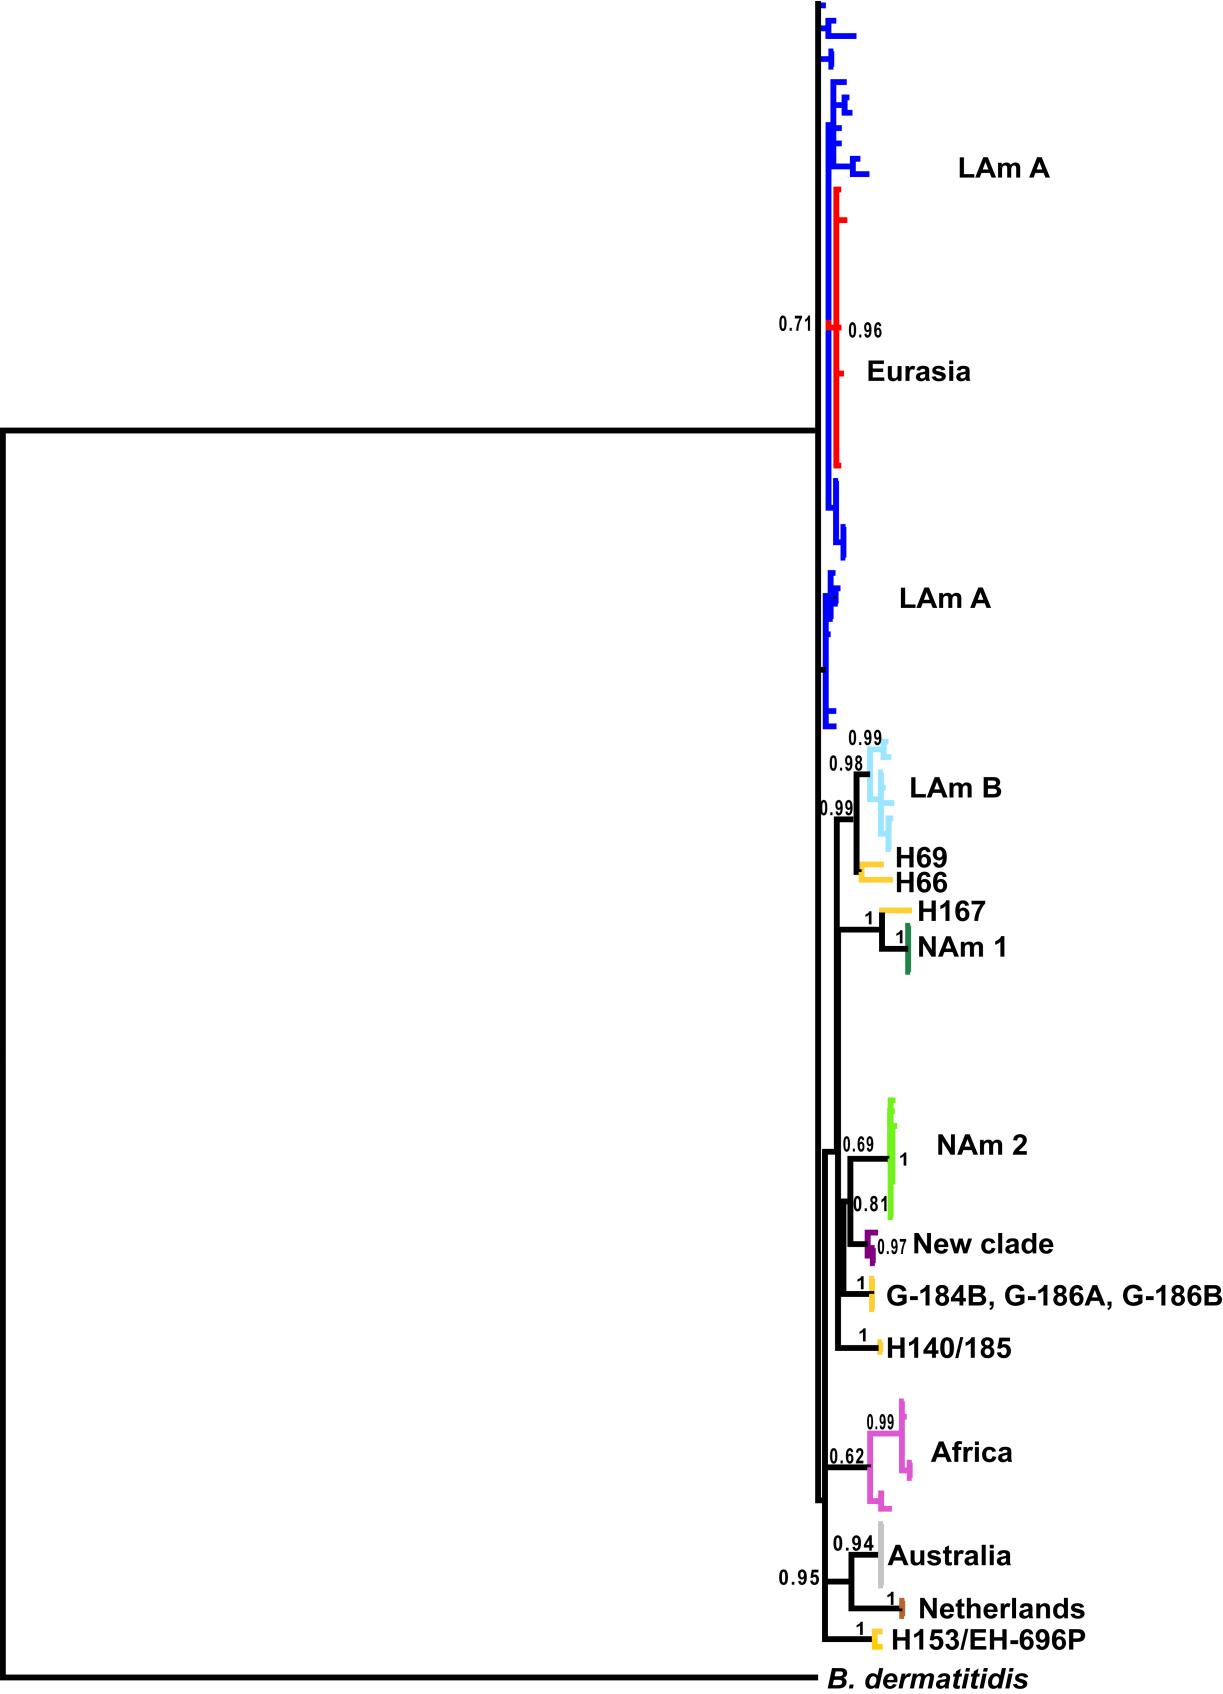

Supplement: s1 [file s1]

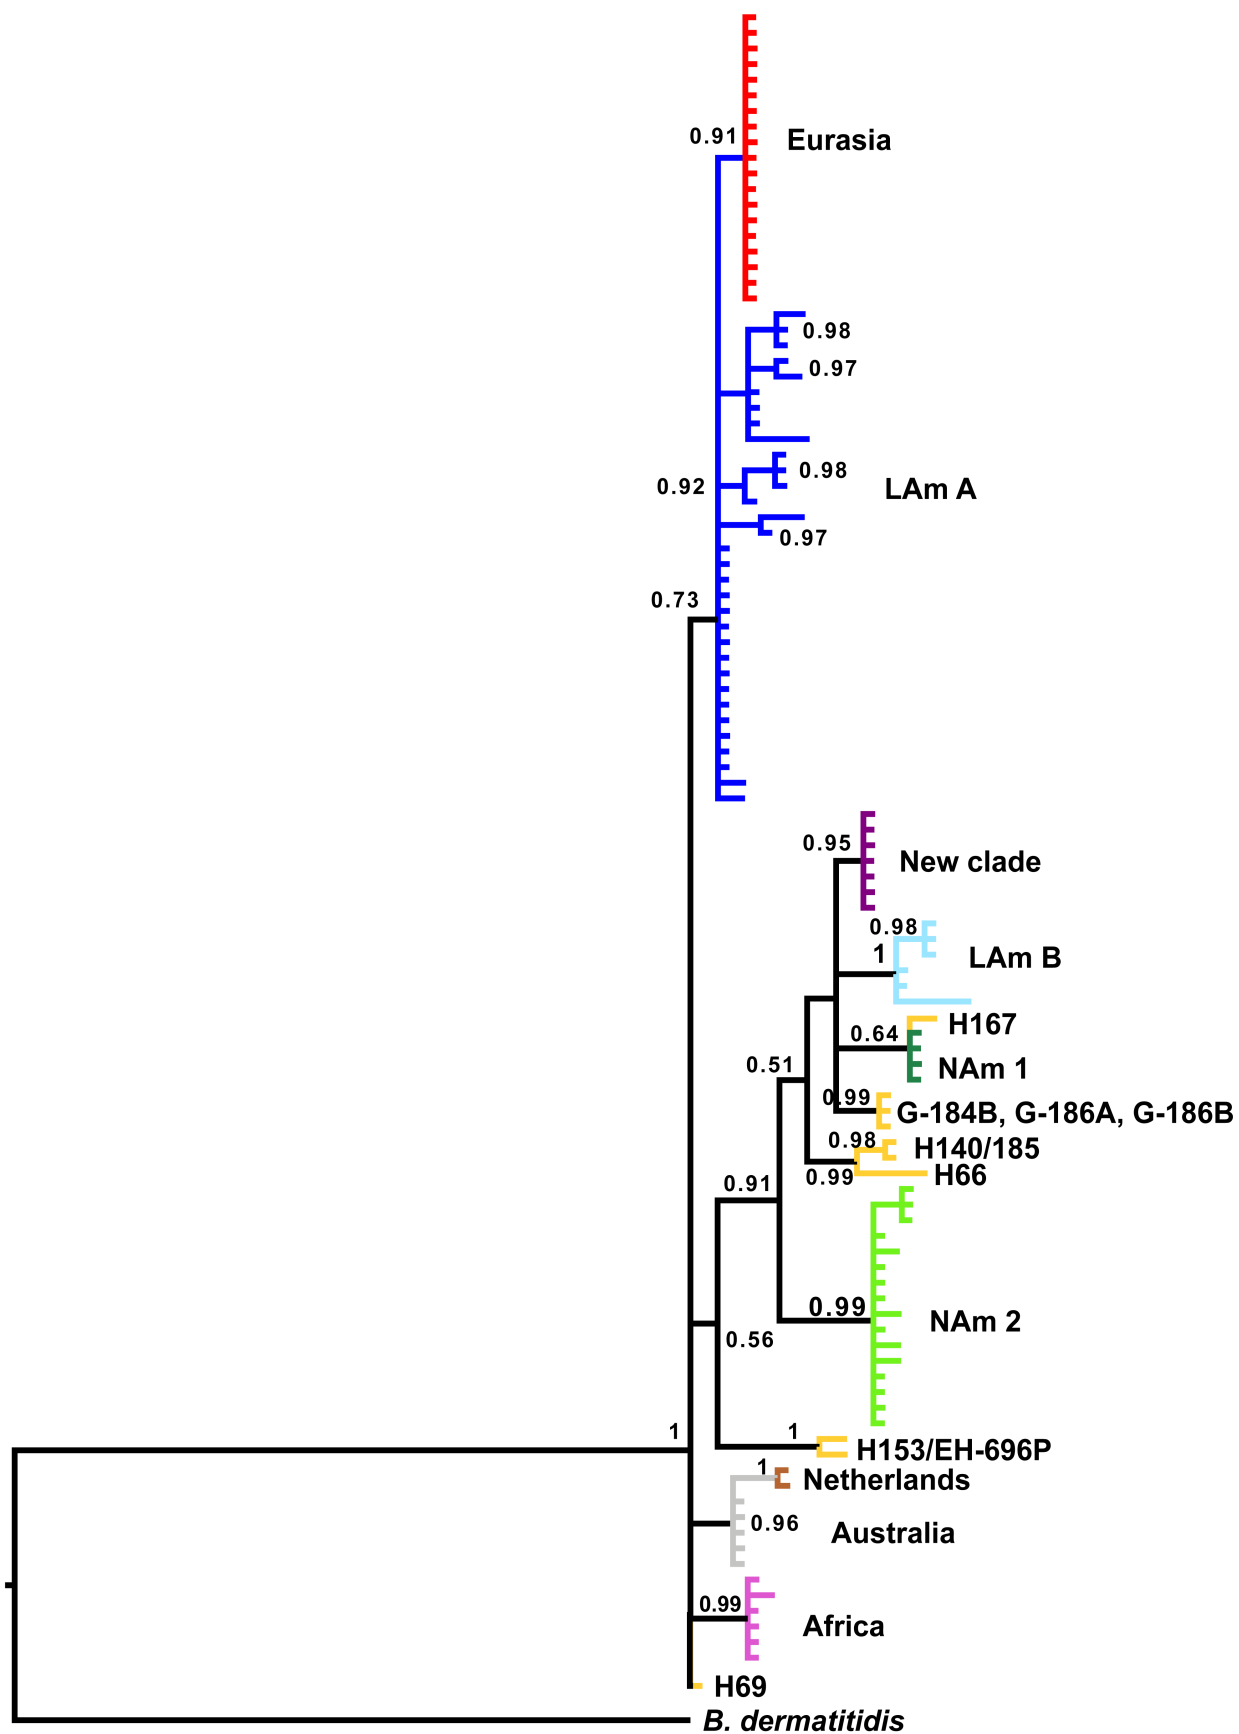

Supplement: s1 [file s1]

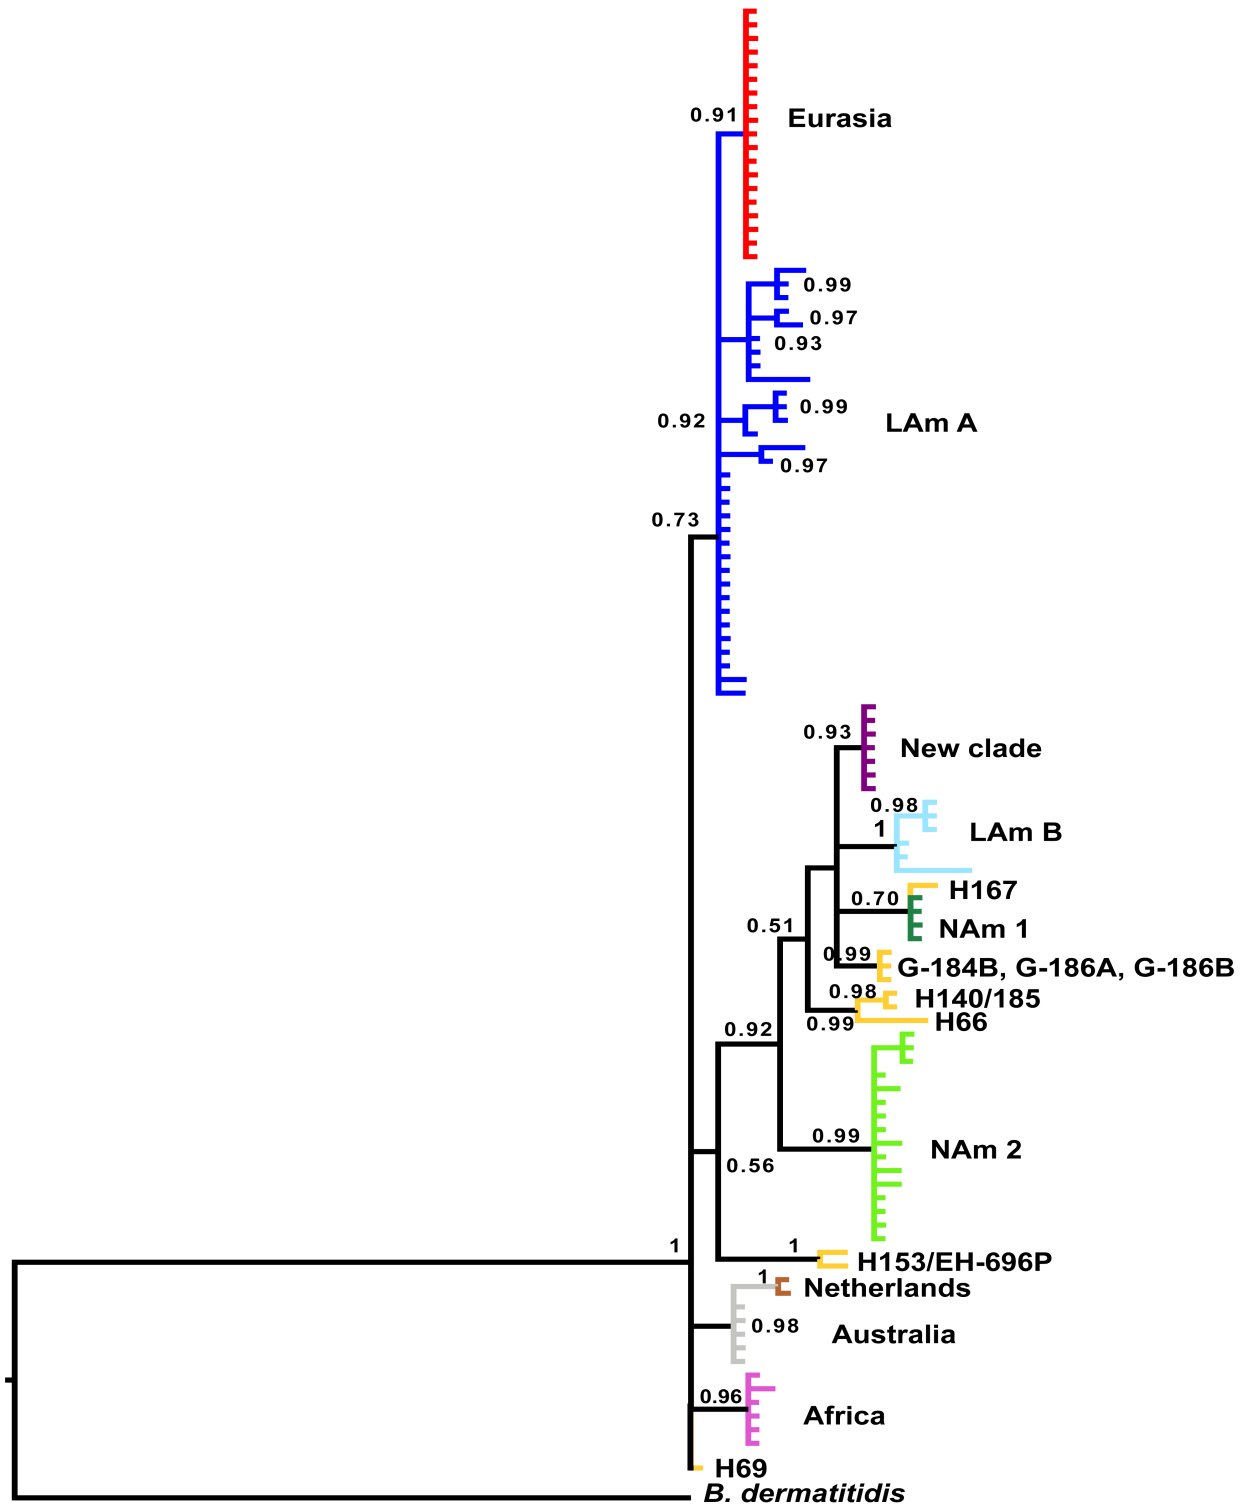

Supplement: s1 [file s1]

arf

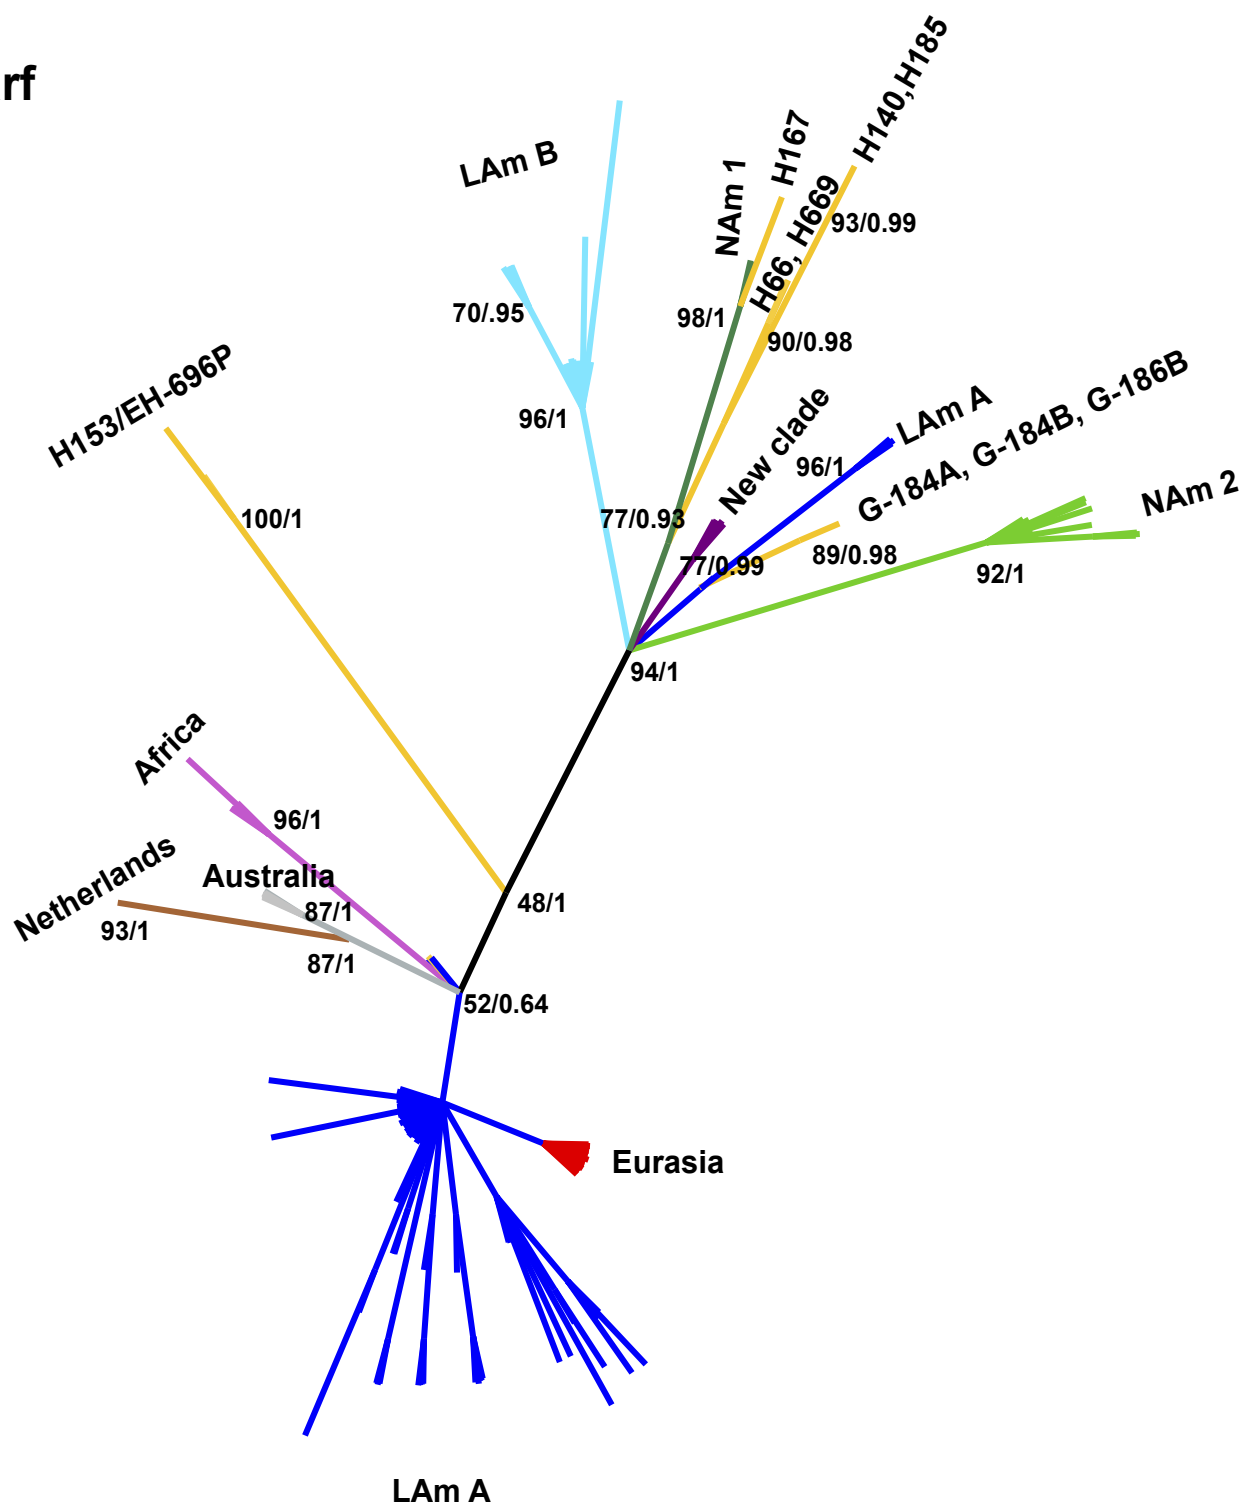

Supplement: s1 [file s1]

ole1

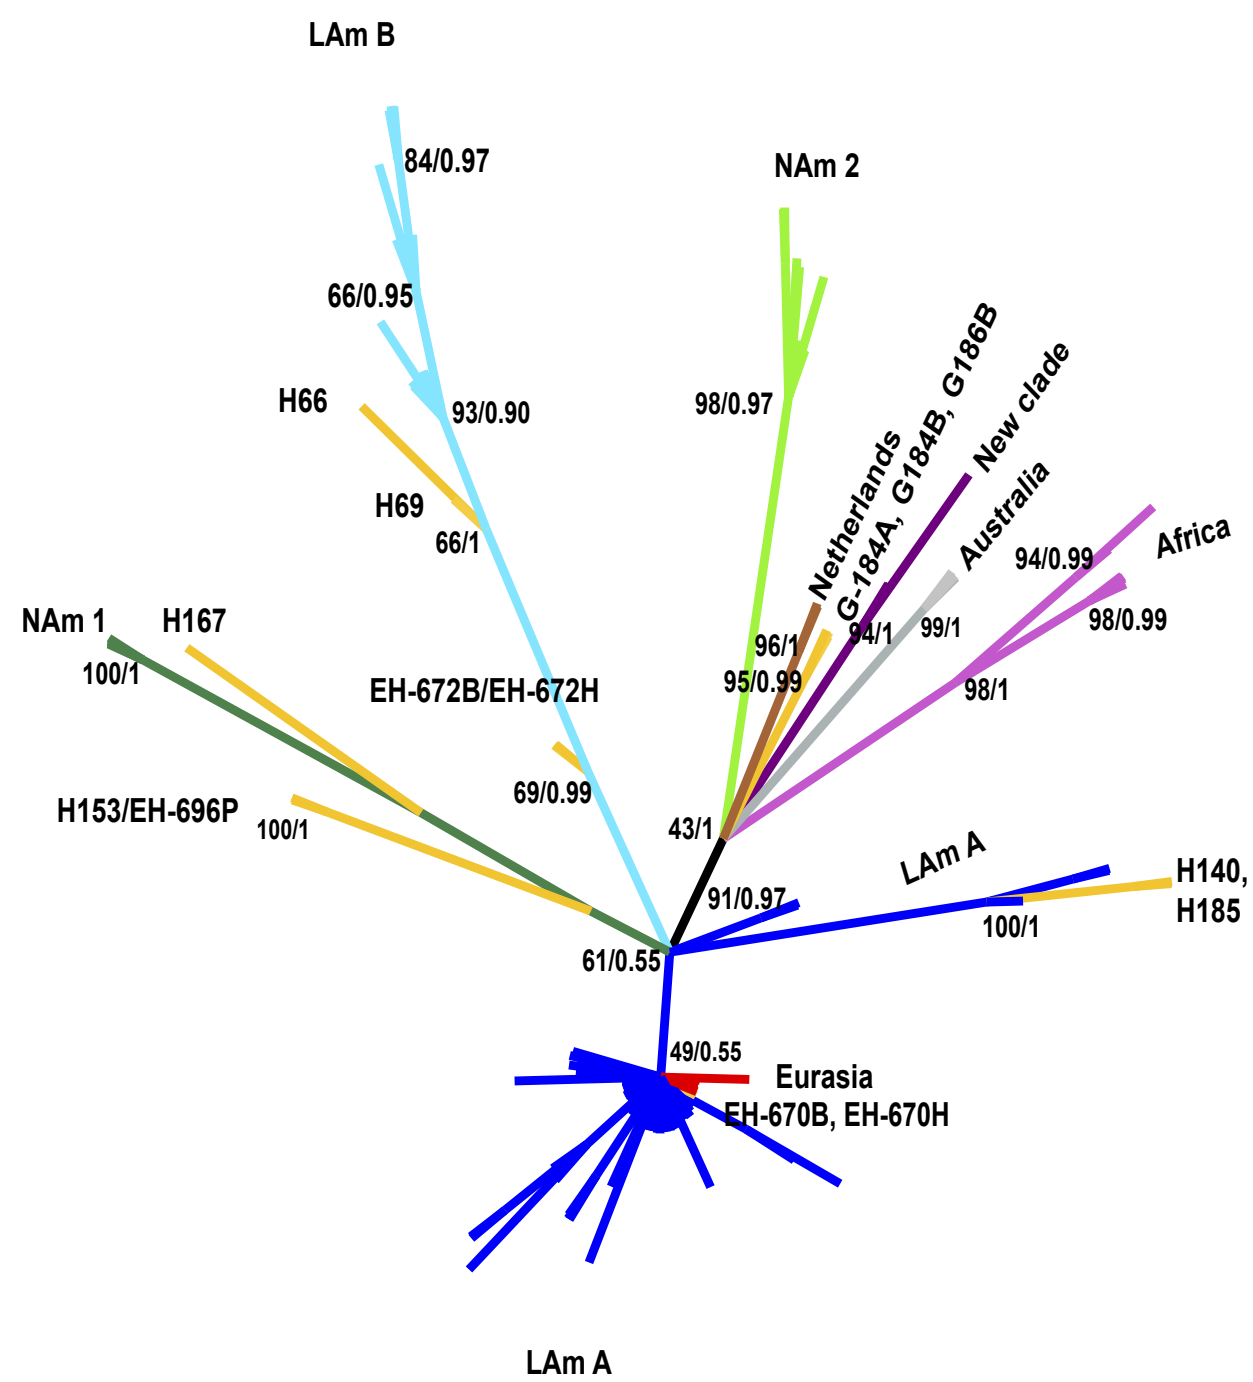

Supplement: s1 [file s1]

H-anti

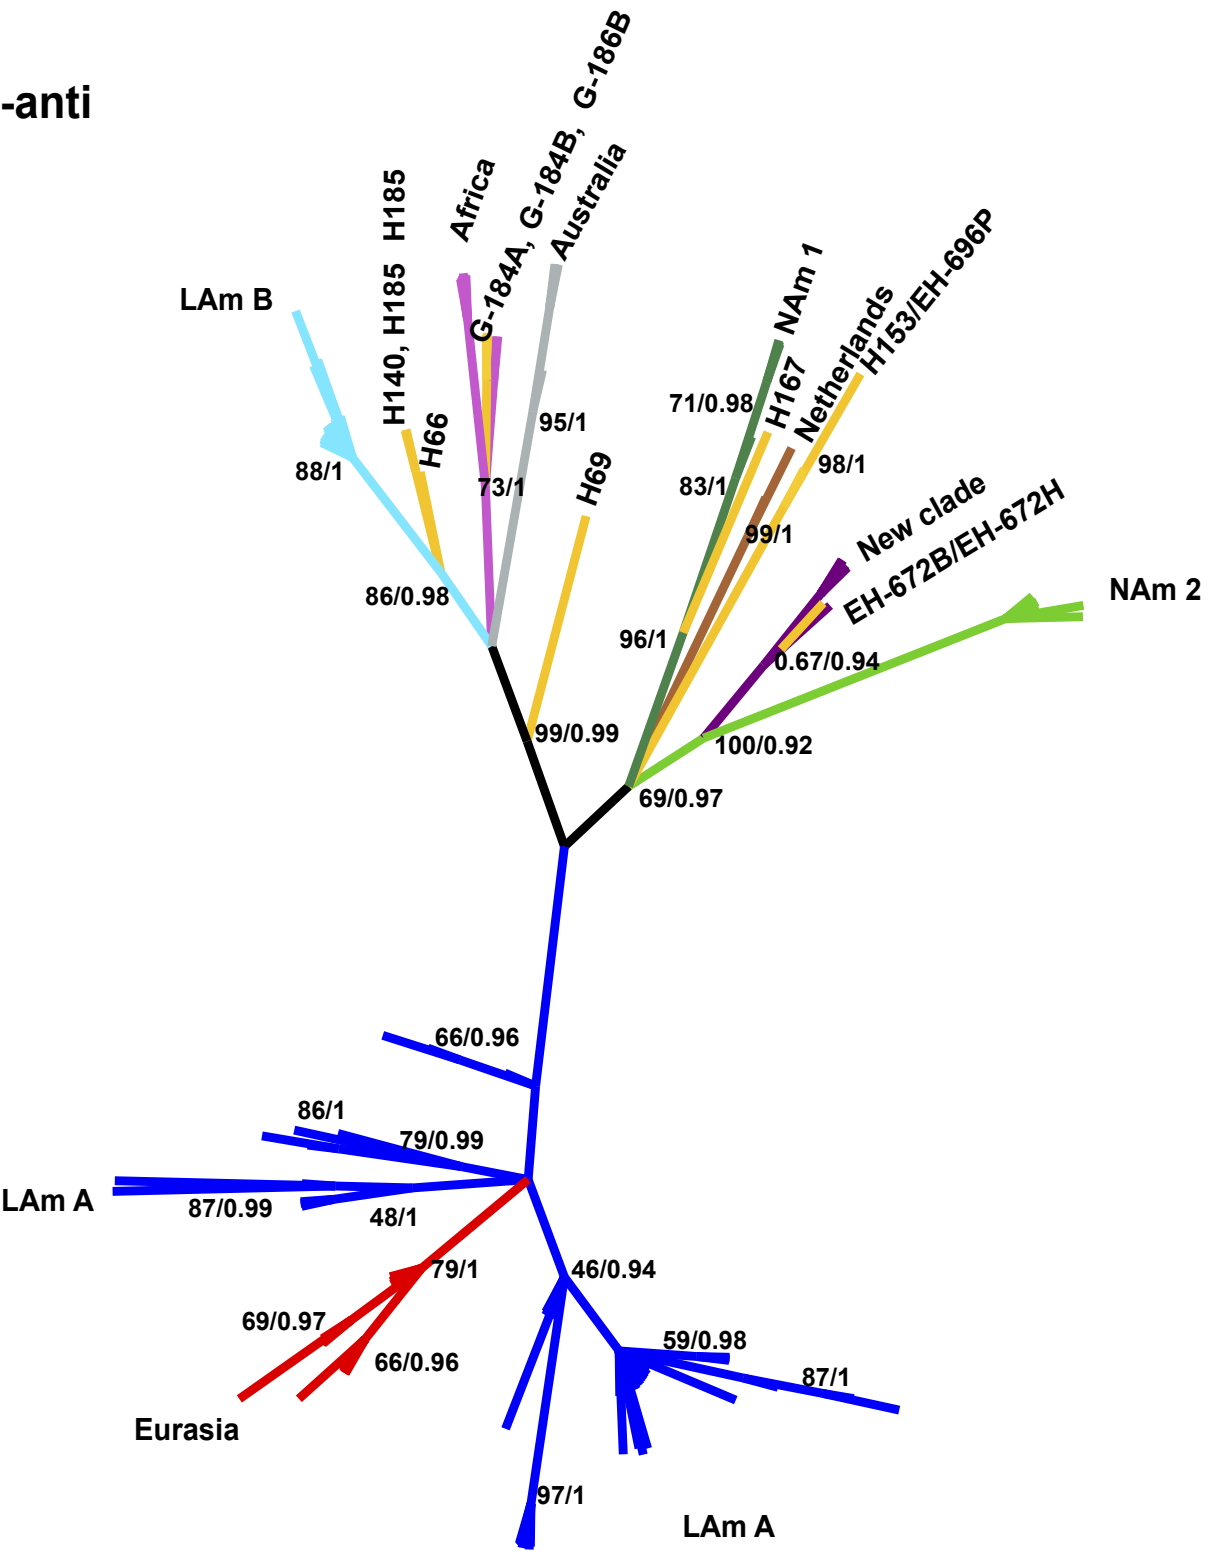

Supplement: s1 [file s1]
